# Supplementary material
Source: HighWire-hosted journal article supplement (https://erj.ersjournals.com/content/55/1/1902287)
Supplement: inline-supplementary-material-1 [file inline-supplementary-material-1.pdf]

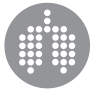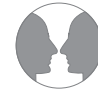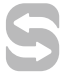

SHAREABLE PDF

# Connected real-life research, a pillar of P4 medicine

Nicolas Roche<sup>1,2</sup>, Antonio Anzueto<sup>2,3</sup>, Sinthia Bosnic Anticevich<sup>2,4</sup>, Alan Kaplan<sup>2,5</sup>, Marc Miravittles <sup>2,6</sup>, Dermot Ryan <sup>2,7</sup>, Joan B. Soriano <sup>2,8</sup>, Omar Usmani<sup>2,9</sup>, Nikos Papadopoulos <sup>2,10,11</sup> and G. Walter Canonica<sup>2,12</sup>

**Affiliations:** <sup>1</sup>Respiratory Medicine, Hôpitaux Universitaires Paris Centre, Hôpital Cochin, AP-HP and Université de Paris (UMR1016), Paris, France. <sup>2</sup>Respiratory Effectiveness Group, Board of Directors, Ely, UK. <sup>3</sup>University of Texas Health and South Texas Veterans Health Care System, San Antonio, TX, USA. <sup>4</sup>Woolcock Institute of Medical Research, The University of Sydney, Sydney Local Health District, Sydney, Australia. <sup>5</sup>Dept of Family and Community Medicine, University of Toronto, Toronto, ON, Canada. <sup>6</sup>Pneumology Dept, University Hospital Vall d'Hebron, Ciber de Enfermedades Respiratorias (CIBERES), Barcelona, Spain. <sup>7</sup>Allergy and Respiratory Research Group, Usher Institute of Population Health Sciences and Informatics, University of Edinburgh, Medical School, Edinburgh, UK. <sup>8</sup>Hospital Universitario de la Princesa, Universidad Autónoma de Madrid and Centro de Investigación en Red de Enfermedades Respiratorias (CIBERES), Instituto de Salud Carlos III (ISCIII), Madrid, Spain. <sup>9</sup>National Heart and Lung Institute, Imperial College London and Royal Brompton Hospital, Airways Disease Section, London, UK. <sup>10</sup>Division of Infection, Immunity and Respiratory Medicine, University of Manchester, Manchester, UK. <sup>11</sup>Allergy Dept, 2nd Pediatric Clinic, National and Kapodistrian University of Athens, Athens, Greece. <sup>12</sup>Respiratory Disease and Allergy Clinic, IRCCS Humanitas Clinical and Research Center, Humanitas University, Milan, Italy.

**Correspondence:** Nicolas Roche, Pneumologie, Hôpital Cochin, 27, rue du Fbg St Jacques, 75014 Paris, France.  
E-mail: nicolas.roche@aphp.fr

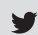

@ERSpublications

**Assessment of m-Health tools needs to include high-quality real-life research studies. Reciprocally, real-life research can benefit highly from opportunities offered by connected devices.**

<http://bit.ly/2OK4Fqr>

**Cite this article as:** Roche N, Anzueto A, Bosnic Anticevich S, *et al.* Connected real-life research, a pillar of P4 medicine. *Eur Respir J* 2020; 55: 1902287 [https://doi.org/10.1183/13993003.02287-2019].

This single-page version can be shared freely online.

## From the authors:

We thank I. Gonda for outlining the promises and challenges of real-life research (RLR), following the publication of the Respiratory Effectiveness Group manifesto in the *European Respiratory Journal* [1]. As outlined in this correspondence, the ultimate goal of RLR is to improve patients' outcomes through more precise decision-making in the current era of personalised medicine. To this aim, RLR provides evidence complementing randomised controlled trials (RCTs), especially exploring benefit–risk–cost ratios in both large and specific subpopulations, while minimising the Hawthorne effect. I. Gonda underlines a particularly important aspect of RLR, *i.e.* how it can be revolutionised by new technologies. This is especially promising in the respiratory field, where therapy administered with inhalation devices plays a major role, while many chronic conditions are under the influence of environmental conditions that can now be continuously recorded.
